# Supplementary figures and images for: Using the DASH Questionnaire to Evaluate Donor Site Morbidity of the Serratus Anterior Free Flap in Head and Neck Reconstruction: A Multicenter Study
Source: MDPI journal article supplement (doi:10.3390/jcm11092397), 2022-04-25

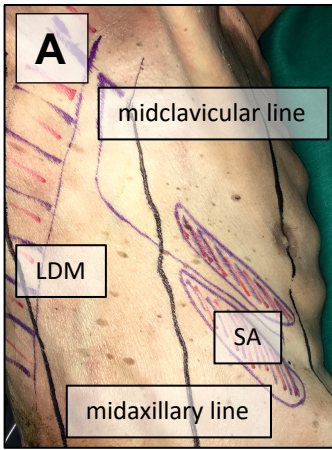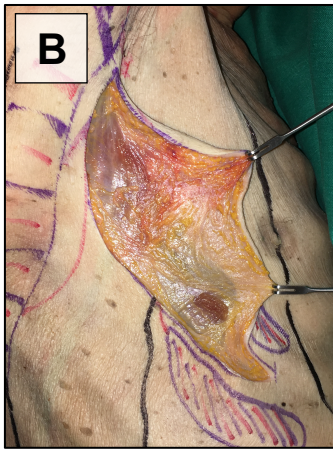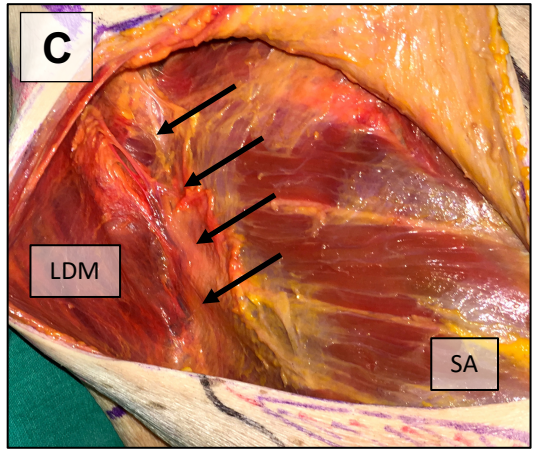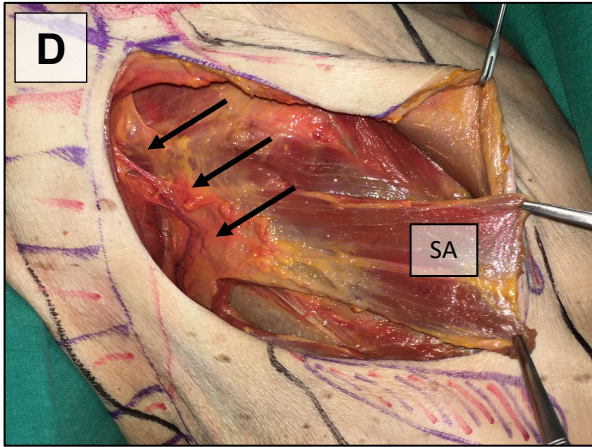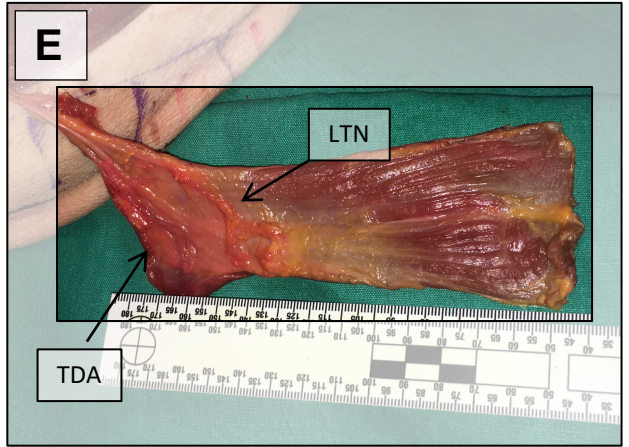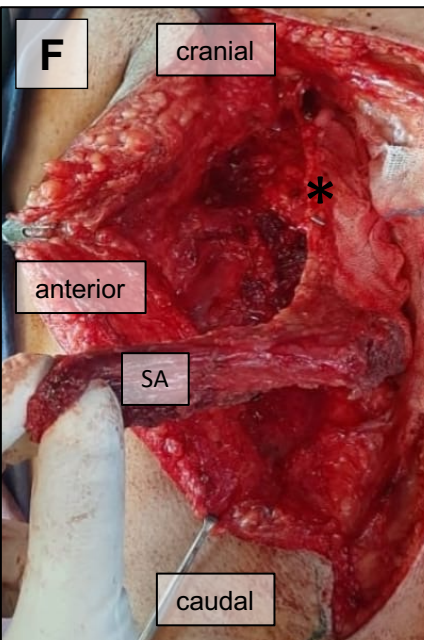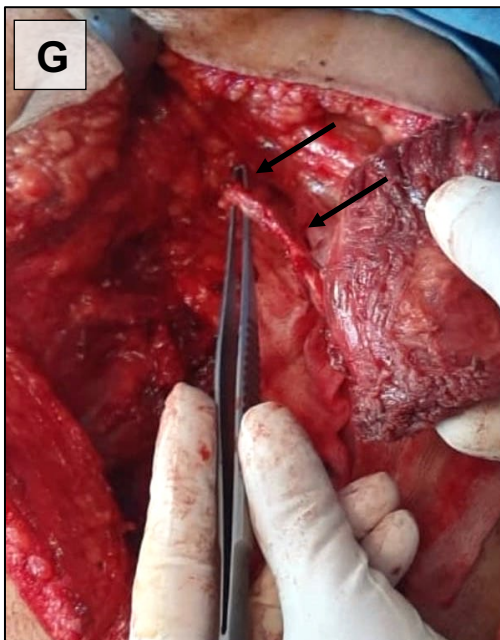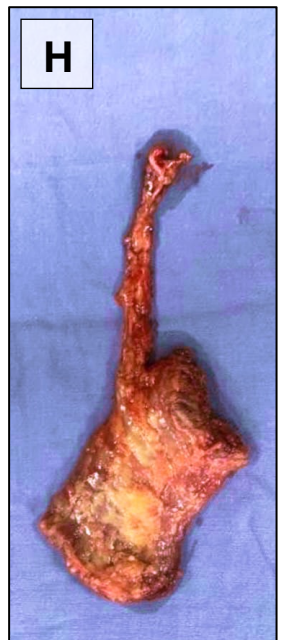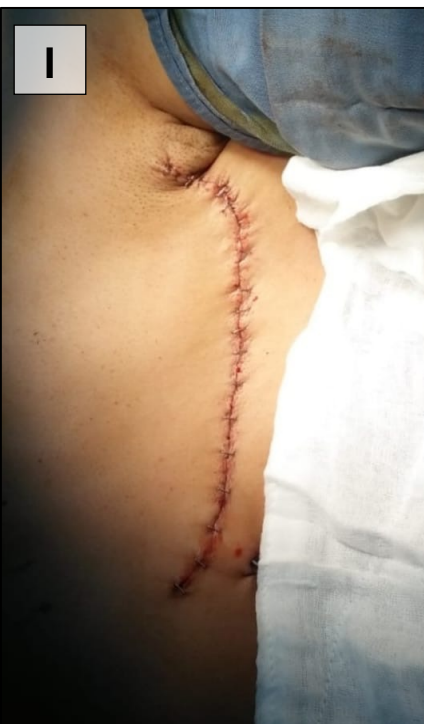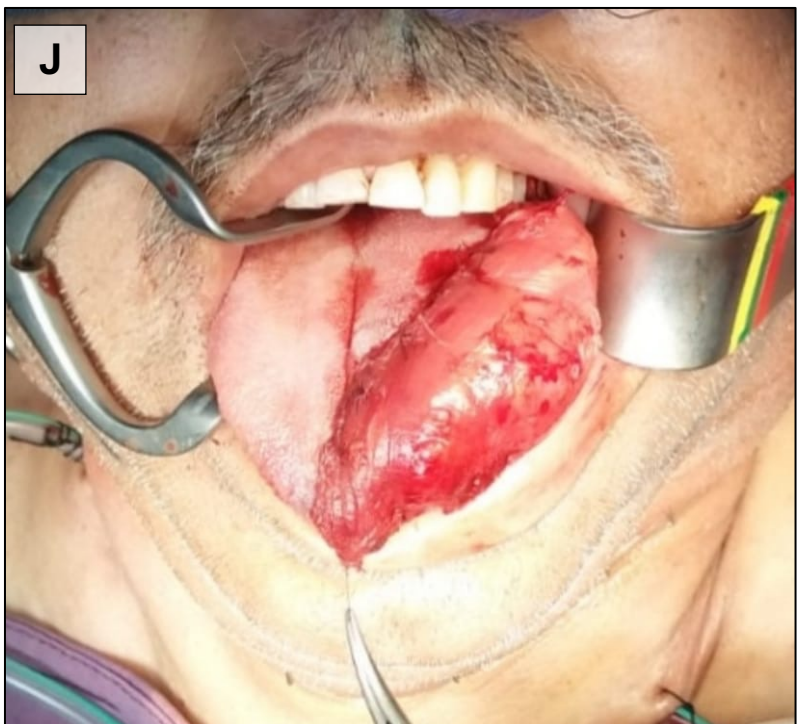

Supplement: s1 [file s1]
